# Supplementary material for: Metabolomic Response of Equine Skeletal Muscle to Acute Fatiguing Exercise and Training
Source: PubMed Central journal article supplement (PMC7040365; doi:10.3389/fphys.2020.00110), 2020-02-18
Supplement: Table_2.pdf [file Table_2.pdf]

**Supplementary Table S2.** Table showing statistical comparisons by way of ANOVA contrasts in the unconditioned and conditioned states. From analysis of the dataset, a total 545 named biochemicals were detected. Red signifies the number of metabolites significantly ( $p < 0.05$ ;  $q < 0.1$ ) increased; green signifies the number of metabolites significantly ( $p < 0.05$ ;  $q < 0.1$ ) decreased.

| Statistical Comparisons<br>ANOVA Contrasts |                   |                                                  |                      |
|--------------------------------------------|-------------------|--------------------------------------------------|----------------------|
|                                            |                   | Total biochemicals<br>( $p < 0.05$ ; $q < 0.1$ ) | Biochemicals<br>(↑↓) |
| Unconditioned                              | <u>T3</u><br>Pre  | 31                                               | 29 2                 |
|                                            | <u>T24</u><br>Pre | 1                                                | 1 0                  |
|                                            | <u>T24</u><br>T3  | 12                                               | 1 11                 |
| Conditioned                                | <u>T3</u><br>Pre  | 142                                              | 100 42               |
|                                            | <u>T24</u><br>Pre | 150                                              | 13 137               |
|                                            | <u>T24</u><br>T3  | 223                                              | 26 197               |
|                                            |                   |                                                  |                      |
